# Supplementary material
Source: PubMed Central journal article supplement (PMC3563862)

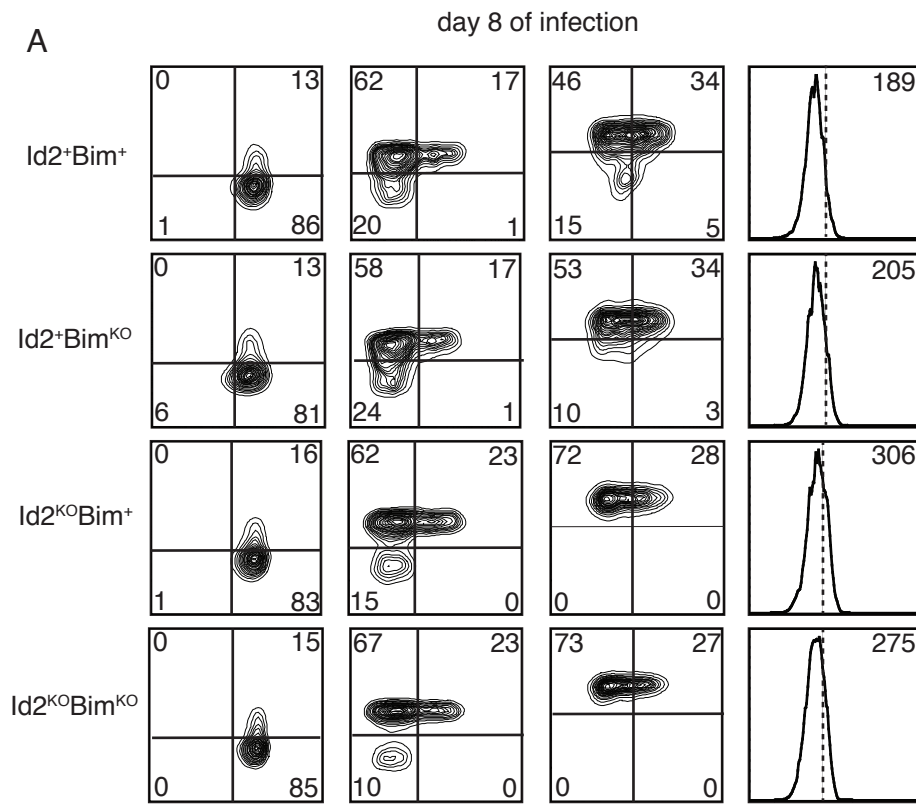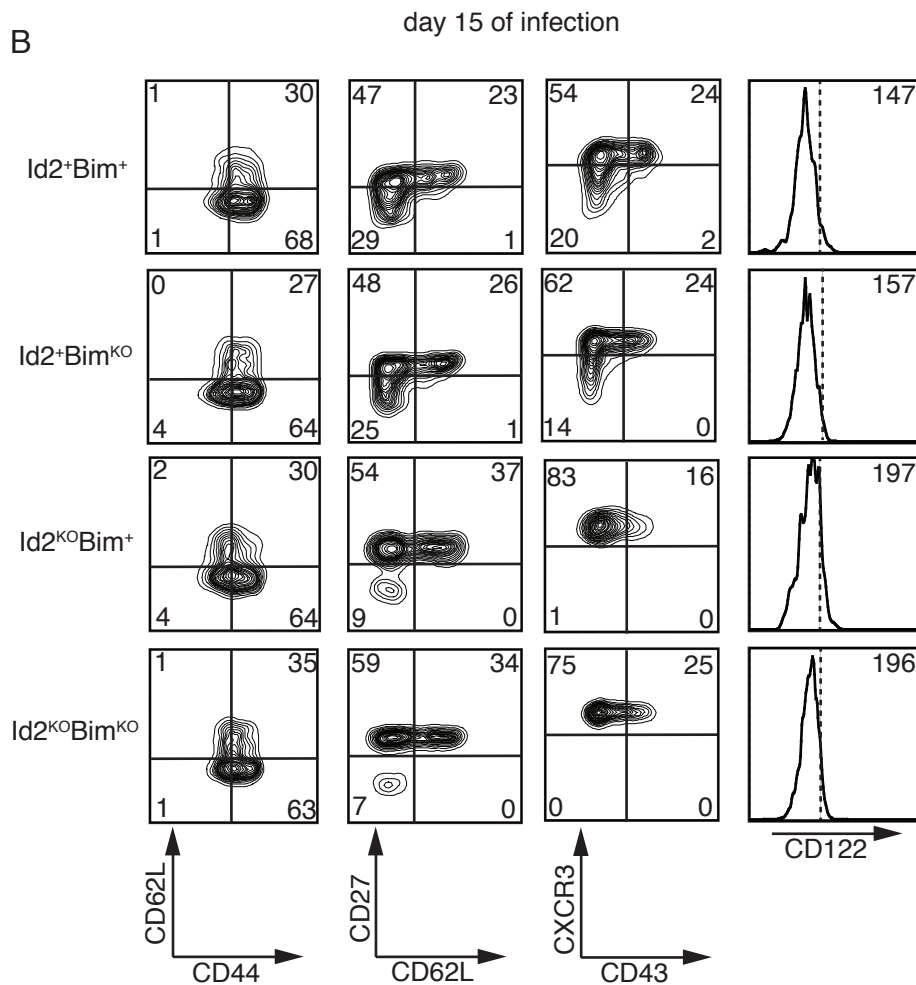

Supplement: NIHMS429383-supplement-3.pdf [file NIHMS429383-supplement-3.pdf]

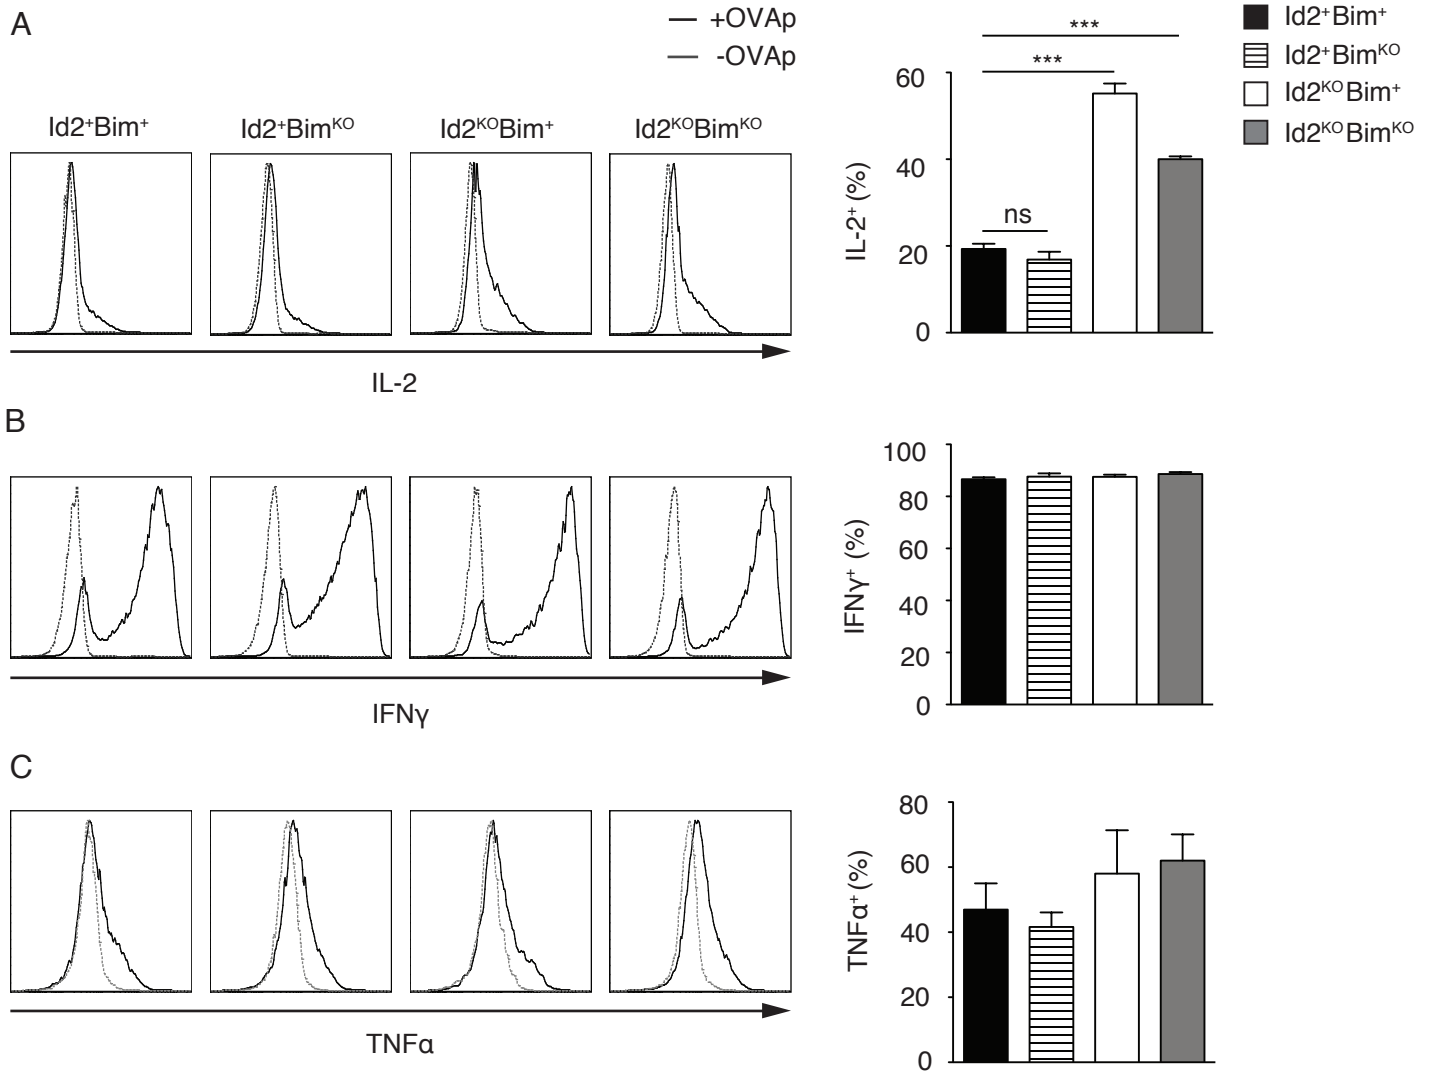

Supplement: NIHMS429383-supplement-4.pdf [file NIHMS429383-supplement-4.pdf]

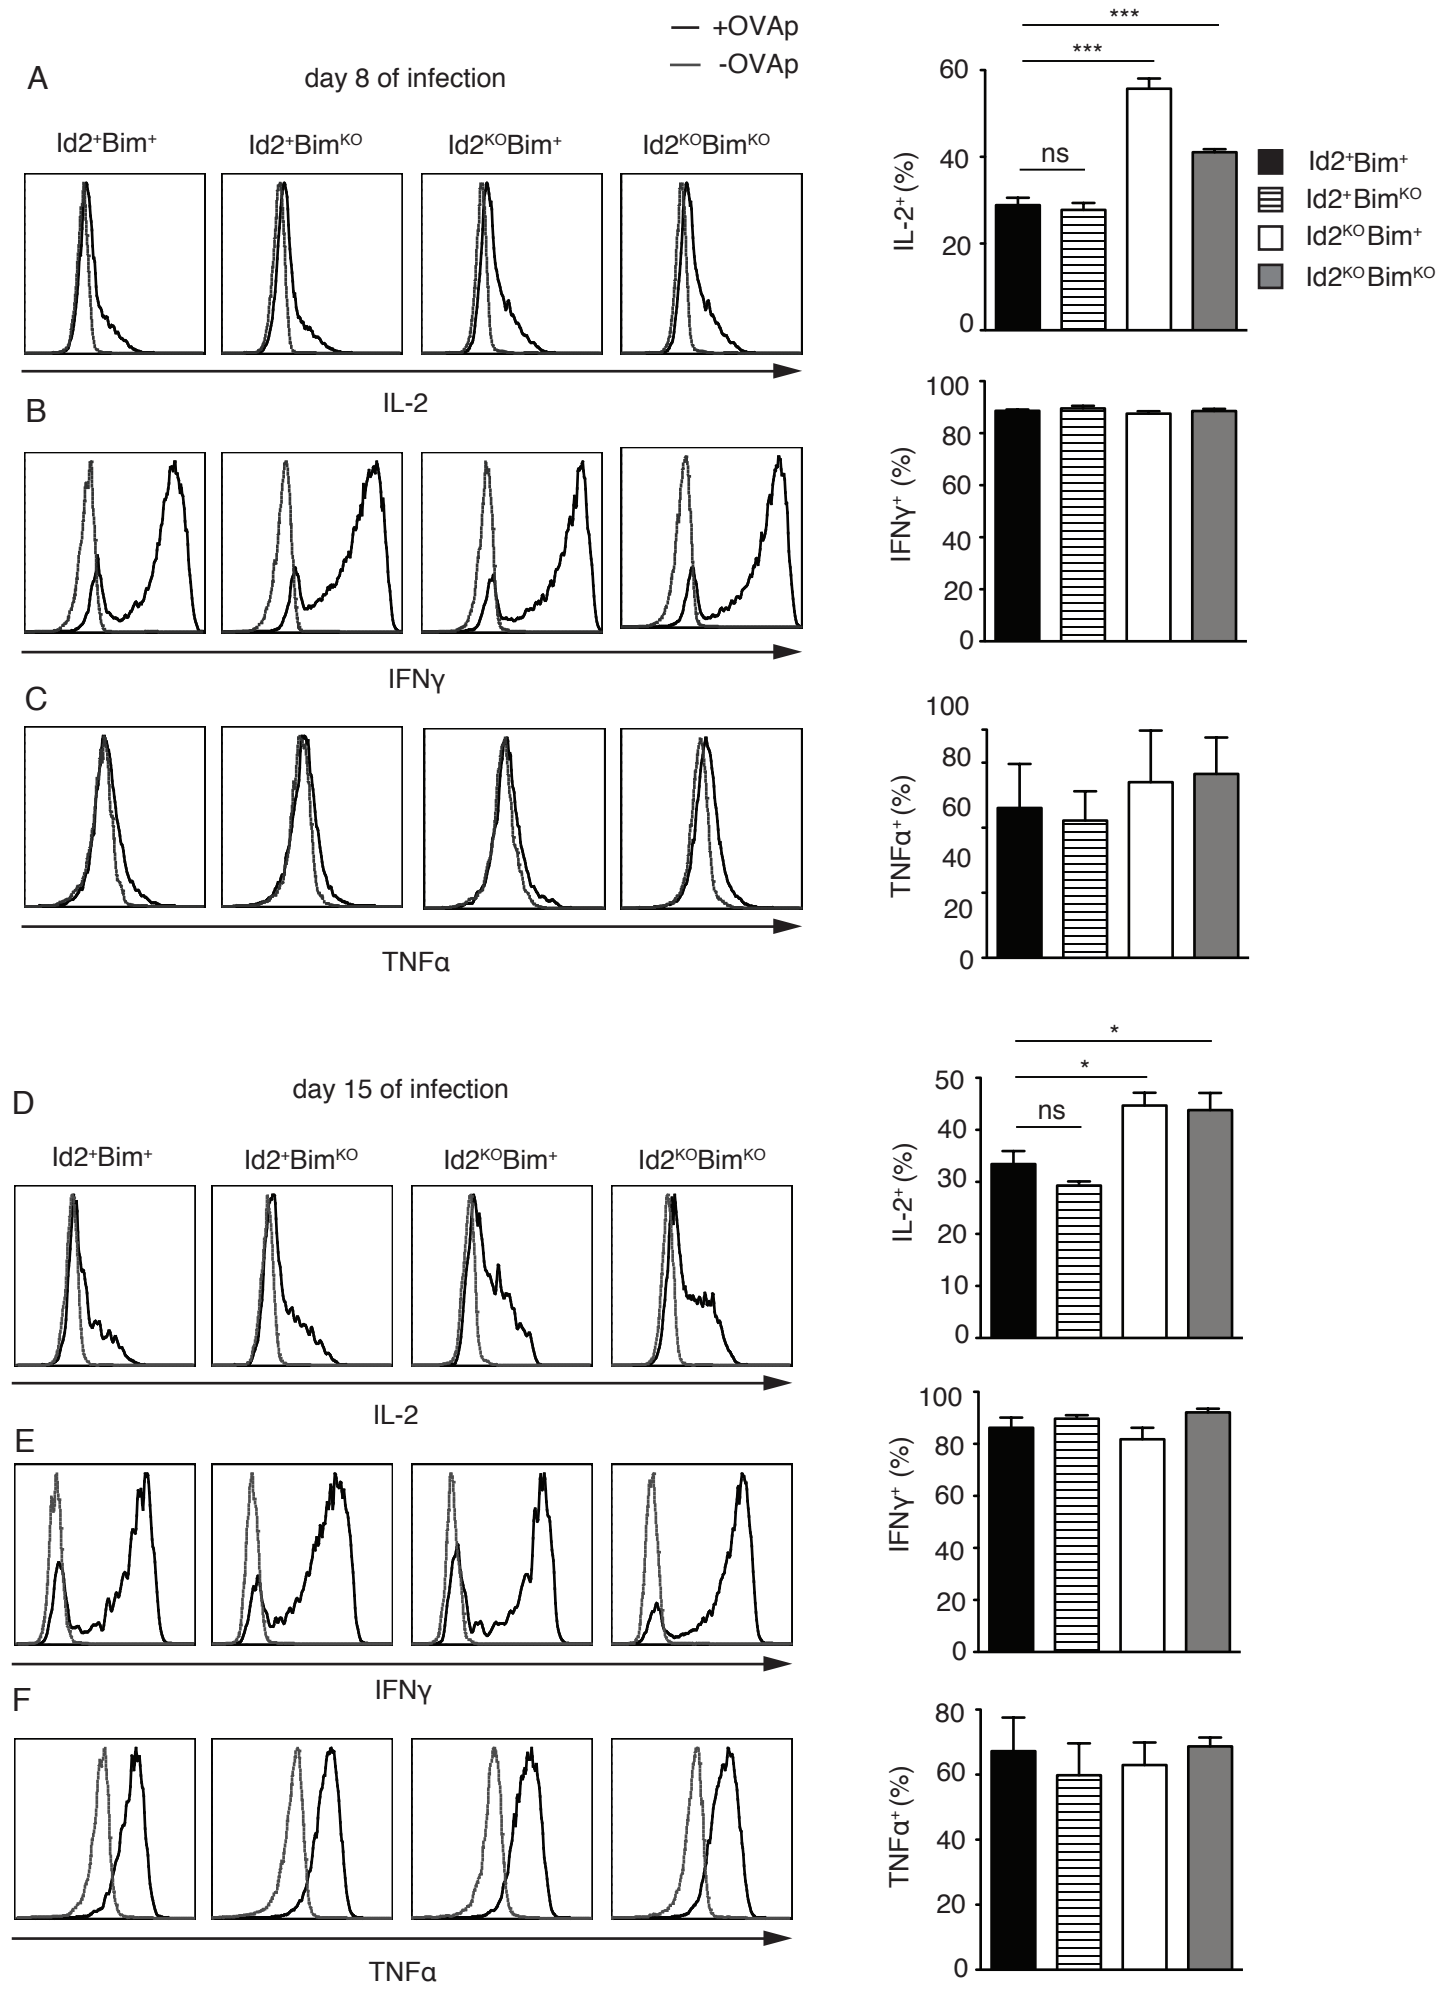

Supplement: NIHMS429383-supplement-5.pdf [file NIHMS429383-supplement-5.pdf]
